# Supplementary material for: High genomic diversity in the endangered East Greenland Svalbard Barents Sea stock of bowhead whales (Balaena mysticetus)
Source: PubMed Central journal article supplement (PMC9005726; doi:10.1038/s41598-022-09868-5), 2022-04-12
Supplement: 41598_2022_9868_MOESM3_ESM.pdf [file 41598_2022_9868_MOESM3_ESM.pdf]

**Supplementary Table S1.** EGSB bowhead whale stock samples included in the current study.

| Sample ID    | collected | sex    | Latitude | Longitude | raw reads   | Percent reads that mapped to reference | Coverage (ca. x) | SRA BioProjects: PRJNA643010 and PRJN798027 accessions |
|--------------|-----------|--------|----------|-----------|-------------|----------------------------------------|------------------|--------------------------------------------------------|
| <b>17-05</b> | 03.06.17  | male   | 76.53N   | 3.54W     | 253,183,490 | 95.6                                   | 13.88            | SRR15669496                                            |
| <b>17-07</b> | 04.06.17  | female | 76.41N   | 4.14W     | 365,705,208 | 95.9                                   | 20.22**          | SRR15669495                                            |
| <b>17-08</b> | 04.06.17  | male   | 76.41N   | 4.14W     | 439,217,342 | 94.9                                   | 23.74**          | SRR15669492                                            |
| <b>17-10</b> | 04.06.17  | female | 76.34N   | 3.28W     | 300,910,478 | 95.8                                   | 16.54**          | SRR15669491                                            |
| <b>17-12</b> | 04.06.17  | female | 76.35N   | 3.36W     | 425,564,908 | 95.7                                   | 23.22**          | SRR15669490                                            |
| <b>17-17</b> | 05.06.17  | male   | 76.34N   | 3.20W     | 403,224,222 | 95.2                                   | 21.94**          | SRR15669489                                            |
| <b>17-18</b> | 05.06.17  | male   | 76.29N   | 2.33W     | 406,088,430 | 95.7                                   | 20.88**          | SRR15669488                                            |
| <b>17-19</b> | 08.06.17  | male   | 76.50N   | 4.30W     | 499,791,902 | 95.2                                   | 20.68**          | SRR15669487                                            |
| <b>17-20</b> | 08.06.17  | female | 76.50N   | 4.30W     | 264,272,696 | 95.5                                   | 14.02            | SRR15669486                                            |
| <b>17-21</b> | 08.06.17  | male   | 76.50N   | 4.31W     | 445,609,500 | 95.8                                   | 23.98**          | SRR15669485                                            |
| <b>18-05</b> | 31.08.18  | male   | 79.17N   | 18.25W    | 283,687,998 | 95.9                                   | 15.06            | SRR15669494                                            |
| <b>18-06</b> | 31.08.18  | male   | 79.17N   | 18.25W    | 302,575,026 | 95.8                                   | 16.06            | SRR15669493                                            |
| <b>A*</b>    | 18.04.06  | female | 80.58N   | 2.09E     | 25,326,811  |                                        | 2.34             | SRR17645797                                            |
| <b>B*</b>    | 18.04.06  | female | 80.58N   | 2.09E     | 22,803,823  |                                        | 2.27             | SRR17645796                                            |
| <b>C*</b>    | 18.04.06  | female | 80.58N   | 2.09E     | 24,404,362  |                                        | 2.45             | SRR17645795                                            |
| <b>D*</b>    | 18.04.06  | female | 80.58N   | 2.09E     | 24,528,479  |                                        | 1.72             | SRR17645794                                            |
| <b>E*</b>    | 18.04.06  | female | 80.58N   | 2.09E     | 10,698,925  |                                        | 1.09             | SRR17645793                                            |
| <b>F*</b>    | 18.04.06  | female | 80.58N   | 2.09E     | 26,861,564  |                                        | 0.8              | SRR17645792                                            |
| <b>I*</b>    | 03.04.10  | female | 79.54N   | 1.03E     | 23,232,087  |                                        | 2.05             | SRR17645791                                            |

\* sequence data from Nyhus *et al.*<sup>19</sup> (for relatedness analysis only); \*\* samples used for calculation of autosome-wide heterozygosity
