# Supplementary material for: High genomic diversity in the endangered East Greenland Svalbard Barents Sea stock of bowhead whales (Balaena mysticetus)
Source: PubMed Central journal article supplement (PMC9005726; doi:10.1038/s41598-022-09868-5), 2022-04-12
Supplement: 41598_2022_9868_MOESM5_ESM.pdf [file 41598_2022_9868_MOESM5_ESM.pdf]

**Supplementary Table S3.** Results of the ROHan analysis specifying a ROH if 1Mb of data contains an average proportion of heterozygous sites less than  $5 \times 10^{-5}$  for the definition of a ROH.

| <b>Sample</b> | <b>% of segments in ROH</b> | <b>Lower bound estimate</b> | <b>Upper bound estimate</b> | <b>Avg. length of ROH</b> |
|---------------|-----------------------------|-----------------------------|-----------------------------|---------------------------|
| <b>17-05</b>  | 0.1490                      | 0.1490                      | 0.1490                      | 2,000,000                 |
| <b>17-07</b>  | 0.0746                      | 0.0000                      | 0.1493                      | 1,000,000                 |
| <b>17-08</b>  | 0.5975                      | 0.3734                      | 0.9767                      | 2,000,000                 |
| <b>17-10</b>  | 1.7280                      | 0.9738                      | 2.3538                      | 1,916,670                 |
| <b>17-12</b>  | 0.1494                      | 0.1493                      | 0.2240                      | 2,000,000                 |
| <b>17-17</b>  | 1.4211                      | 1.0471                      | 2.1164                      | 1,900,000                 |
| <b>17-18</b>  | 0.0000                      | 0.0000                      | 0.0000                      | 0                         |
| <b>17-19</b>  | 0.0000                      | 0.0000                      | 0.0000                      | 0                         |
| <b>17-20</b>  | 0.5970                      | 0.1491                      | 0.8258                      | 2,000,000                 |
| <b>17-21</b>  | 0.1490                      | 0.1490                      | 0.1490                      | 2,000,000                 |
| <b>18-05</b>  | 0.6726                      | 0.5966                      | 1.1244                      | 1,800,000                 |
| <b>18-06</b>  | 0.5220                      | 0.2983                      | 0.5232                      | 1,750,000                 |
