# Supplementary material for: High genomic diversity in the endangered East Greenland Svalbard Barents Sea stock of bowhead whales (Balaena mysticetus)
Source: PubMed Central journal article supplement (PMC9005726; doi:10.1038/s41598-022-09868-5), 2022-04-12
Supplement: 41598_2022_9868_MOESM6_ESM.pdf [file 41598_2022_9868_MOESM6_ESM.pdf]

**Supplementary Table S4:** The demographic histories (timeline and  $N_e$  estimates) of EGSB stock bowhead whale. The graphical illustration is presented in Figure 4 of the main manuscript.

**timeline (years)**

| ca.            | 30000        | 50000        | 75000        | 100000        | 150000        | 200000        | 250000        | 500000        | 750000        | 1000000        |
|----------------|--------------|--------------|--------------|---------------|---------------|---------------|---------------|---------------|---------------|----------------|
| 17_05          | 28372        | 52741        | 73104        | 97535         | 143627        | 204198        | 254812        | 525840        | 778497        | 1038480        |
| 17_07          | 31155        | 48126        | 68456        | 106735        | 156919        | 198774        | 248910        | 516363        | 764665        | 1019479        |
| 17_08          | 30668        | 47408        | 78974        | 105340        | 155058        | 196586        | 246388        | 512822        | 760946        | 1016097        |
| 17_10          | 28460        | 52928        | 73386        | 97943         | 144303        | 205270        | 256247        | 529542        | 784645        | 1047369        |
| 17_12          | 31896        | 49274        | 70091        | 109293        | 160695        | 203569        | 254931        | 528975        | 783453        | 1044641        |
| 17_17          | 29376        | 45431        | 75736        | 101073        | 148900        | 211785        | 264360        | 494094        | 734129        | 1079009        |
| 17_18          | 31159        | 48165        | 80233        | 107015        | 157519        | 199699        | 250282        | 520864        | 772827        | 1031904        |
| 17_20          | 33170        | 48944        | 78745        | 103682        | 150796        | 212812        | 264706        | 491805        | 729497        | 1072384        |
| 17_21          | 30936        | 47821        | 79661        | 106254        | 156400        | 198284        | 248512        | 517512        | 767424        | 1024712        |
| 18_05          | 32233        | 49770        | 70760        | 95885         | 143148        | 205041        | 256613        | 480671        | 785668        | 1046444        |
| 18_06          | 31140        | 48122        | 80128        | 106844        | 157193        | 199221        | 249599        | 518793        | 769167        | 1026413        |
| 17_19          | 32785        | 50666        | 72099        | 97791         | 146208        | 209751        | 262792        | 493939        | 734708        | 982086         |
| <b>average</b> | <b>30945</b> | <b>49116</b> | <b>75114</b> | <b>102949</b> | <b>151730</b> | <b>203749</b> | <b>254846</b> | <b>510935</b> | <b>763802</b> | <b>1035751</b> |

**estimated  $N_e$**

|                |             |             |             |             |             |             |             |             |              |              |
|----------------|-------------|-------------|-------------|-------------|-------------|-------------|-------------|-------------|--------------|--------------|
| 17_05          | 6955        | 4306        | 7271        | 8916        | 8256        | 7375        | 5791        | 7994        | 14824        | 24656        |
| 17_07          | 5013        | 7661        | 8771        | 8796        | 8082        | 7286        | 6611        | 8693        | 16214        | 21708        |
| 17_08          | 3293        | 9265        | 9754        | 9067        | 8585        | 7639        | 6853        | 8850        | 16336        | 21699        |
| 17_10          | 4402        | 10240       | 8826        | 7925        | 7526        | 6533        | 6096        | 8110        | 14745        | 24646        |
| 17_12          | 4670        | 9113        | 10139       | 8131        | 7869        | 7334        | 6828        | 8940        | 16773        | 22456        |
| 17_17          | 3323        | 6561        | 9096        | 8318        | 8357        | 7344        | 6666        | 8333        | 15072        | 26169        |
| 17_18          | 2564        | 9884        | 9823        | 8906        | 8555        | 7834        | 7045        | 8945        | 16185        | 21754        |
| 17_20          | 7256        | 7256        | 8111        | 7714        | 6571        | 6072        | 5783        | 7337        | 13212        | 22431        |
| 17_21          | 2778        | 8015        | 9358        | 8759        | 8168        | 7518        | 6990        | 8865        | 16236        | 21768        |
| 18_05          | 2332655     | 14879       | 12077       | 11558       | 6630        | 7215        | 7088        | 6780        | 15938        | 21158        |
| 18_06          | 12486       | 8984        | 6334        | 6803        | 8089        | 7861        | 7004        | 8658        | 16262        | 21582        |
| 17_19          | 6157        | 4929        | 8838        | 10208       | 9081        | 8008        | 7270        | 7505        | 12104        | 22709        |
| <b>average</b> | <b>6157</b> | <b>8424</b> | <b>9033</b> | <b>8758</b> | <b>7980</b> | <b>7334</b> | <b>6668</b> | <b>8250</b> | <b>15325</b> | <b>22728</b> |

ales using a Pairwise Sequentially Markovian Coalescent (PSMC) model.

| <b>1500000</b> | <b>2000000</b> | <b>3000000</b> | <b>4000000</b> | <b>5000000</b> |
|----------------|----------------|----------------|----------------|----------------|
| 1516374        | 2008125        | 2912048        | 3842180        | 5064467        |
| 1486572        | 1965912        | 3118461        | 4105352        | 4928444        |
| 1484789        | 1966752        | 3128430        | 4125421        | 4958147        |
| 1530725        | 2028521        | 2944363        | 3887563        | 5127943        |
| 1523489        | 2014964        | 2916007        | 3840810        | 5053396        |
| 1577986        | 2090836        | 3034284        | 4005720        | 5283043        |
| 1507777        | 1997088        | 3176379        | 4188404        | 5033645        |
| 1567019        | 2076969        | 3016196        | 3984504        | 5259076        |
| 1497318        | 1983284        | 3154554        | 4159730        | 4999270        |
| 1523828        | 2013093        | 2908752        | 4191969        | 5028797        |
| 1498542        | 1983631        | 3151662        | 4153153        | 4989135        |
| 1577738        | 2088461        | 3025803        | 3988871        | 4792779        |
| <b>1524346</b> | <b>2018136</b> | <b>3040578</b> | <b>4039473</b> | <b>5043178</b> |

|              |              |              |              |              |
|--------------|--------------|--------------|--------------|--------------|
| 27953        | 26810        | 23086        | 20748        | 20870        |
| 29474        | 30033        | 24770        | 21521        | 20877        |
| 29585        | 30770        | 26905        | 22652        | 21561        |
| 29091        | 28609        | 24965        | 21829        | 21329        |
| 30354        | 30287        | 26131        | 23927        | 21148        |
| 31123        | 30754        | 26933        | 22668        | 21571        |
| 30628        | 30893        | 26253        | 22243        | 21504        |
| 26451        | 25792        | 21180        | 20281        | 21137        |
| 30225        | 30594        | 26575        | 22765        | 21788        |
| 28172        | 28598        | 23098        | 21444        | 20982        |
| 28595        | 27959        | 24691        | 23273        | 22246        |
| 31028        | 30694        | 26875        | 24874        | 23294        |
| <b>29389</b> | <b>29316</b> | <b>25121</b> | <b>22352</b> | <b>21525</b> |
