# Supplementary material for: High genomic diversity in the endangered East Greenland Svalbard Barents Sea stock of bowhead whales (Balaena mysticetus)
Source: Sci Rep. 2022 Apr 12;12:6118. doi: 10.1038/s41598-022-09868-5 (PMC9005726; doi:10.1038/s41598-022-09868-5)
Supplement: Supplementary file 4 — Supplementary Table S2. [file 41598_2022_9868_MOESM4_ESM.pdf]

collected in 2017 and 2018 are shaded green, those including the individuals collected in 2006 and 2010 (Nyhus et al. 2016) are shaded grey.

[illegible]
